# Supplementary material
Source: MDPI journal article supplement (https://www.mdpi.com/2073-4352/7/5/139)
Supplement: s1 [file s1]

# Supporting information

## Preparation, Crystal structure and Luminescence Properties of Lanthanide Complexes with 2,4,6-tri(pyridin-2-yl)-1,3,5-triazine and Organic Carboxylic Acid

Jingjing Li<sup>1,2</sup>, Xueqiong Zhang<sup>1</sup>, Bin Yue<sup>1</sup>, Ailing Wang<sup>1</sup>, Lingjuan Kong<sup>1</sup>,  
Jian Zhou<sup>1</sup>, Haibin Chu<sup>1\*</sup>, Yongliang Zhao<sup>1\*\*</sup>

<sup>1</sup>College of Chemistry and Chemical Engineering, Inner Mongolia University, Huhhot 010021, P. R. China;

<sup>2</sup>Hulun Buir Institute of Environmental Science, Hulun Buir 021008, P. R. China.

### 1. Calculation of luminescent quantum efficiency

As for europium compound, with the emission spectrum and the lifetime of the  $\text{Eu}^{3+}$  first excited level ( $\tau$ ,  $^5\text{D}_0$ ), the emission quantum efficiency ( $\eta$ ) of the  $^5\text{D}_0$   $\text{Eu}^{3+}$  excited state can be determined. Assuming that only nonradiative and radiative processes are essentially involved in the depopulation of the  $^5\text{D}_0$  state,  $\eta$  can be defined as follows:

$$\eta = \frac{A_r}{A_r + A_{nr}} \quad (1)$$

Where  $A_r$  and  $A_{nr}$  are radiative and nonradiative transition rates, respectively.  $A_r$  can also be obtained by summing over the radiative rates  $A_{0J}$  for each  $^5\text{D}_0 \rightarrow ^7\text{F}_J$  ( $J=0-4$ ) transitions of  $\text{Eu}^{3+}$ .

$$A_r = \sum A_{0J} = A_{00} + A_{01} + A_{02} + A_{03} + A_{04} \quad (2)$$

The branching ratio for the  $^5\text{D}_0 \rightarrow ^7\text{F}_{5,6}$  transitions can be neglected as they are not detected experimentally. In the above eqn (2),  $A_{0J}$  can be calculated from the following equation:

$$A_{0J} = A_{01} \left( \frac{I_{0J}}{I_{01}} \right) \left( \frac{\nu_{01}}{\nu_{0J}} \right) \quad (3)$$

Here,  $A_{0J}$  is the experimental coefficient of spontaneous emission.  $A_{01}$  is Einstein's coefficient of spontaneous emission between the  $^5\text{D}_0$  and  $^7\text{F}_1$  energy levels.  $A_{01}$  can be determined to be about  $50 \text{ s}^{-1}$ , which can be considered as a reference for the whole spectra.  $I_{0J}$  corresponds to the intensities of the  $^5\text{D}_0 \rightarrow ^7\text{F}_J$  transitions ( $J=0-4$ ).  $I_{01}$  corresponds to the intensity of the transition  $^5\text{D}_0 \rightarrow ^7\text{F}_1$  with  $\nu_{0J}$  ( $\nu_{0J}=1/\lambda_J$ ) energy centers, respectively.

The lifetime ( $\tau$ ), radiative ( $A_r$ ), and nonradiative ( $A_{nr}$ ) transition rates are related via

the following equation:

$$A_{\text{tot}} = 1/\tau = A_r + A_{\text{nr}} \quad (4)$$

By the described in the above computing method, luminescence quantum yield was obtained.

## 2. Crystallographic informations

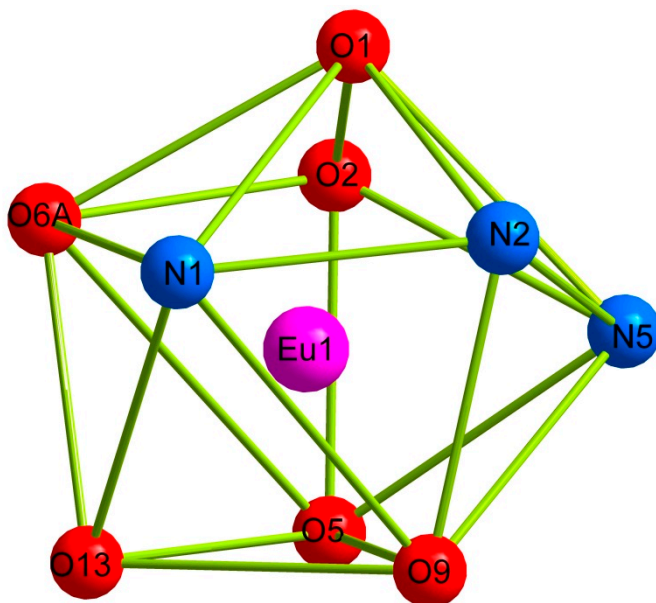

**Figure S1.** Coordination polyhedron of  $\text{Eu}^{3+}$  ions in crystal **1**

**Table S1.** Selected Bond lengths [ $\text{\AA}$ ] and angles [ $^\circ$ ] for crystal **1**

| Bond              |            |                   |            |
|-------------------|------------|-------------------|------------|
| Eu(1)-O(5)        | 2.333(4)   | Eu(1)-O(2)        | 2.532(4)   |
| Eu(1)-O(9)        | 2.368(4)   | Eu(1)-N(2)        | 2.598(4)   |
| Eu(1)-O(6)#1      | 2.410(4)   | Eu(1)-N(1)        | 2.629(5)   |
| Eu(1)-O(1)        | 2.478(3)   | Eu(1)-N(5)        | 2.635(5)   |
| Eu(1)-O(13)       | 2.503(3)   |                   |            |
| Angle             |            |                   |            |
| O(5)-Eu(1)-O(9)   | 82.52(13)  | O(1)-Eu(1)-N(2)   | 67.05(12)  |
| O(5)-Eu(1)-O(6)#1 | 100.81(13) | O(13)-Eu(1)-N(2)  | 123.48(12) |
| O(9)-Eu(1)-O(6)#1 | 143.32(14) | O(2)-Eu(1)-N(2)   | 110.06(12) |
| O(5)-Eu(1)-O(1)   | 124.54(13) | O(5)-Eu(1)-N(1)   | 149.68(13) |
| O(9)-Eu(1)-O(1)   | 135.39(12) | O(9)-Eu(1)-N(1)   | 84.37(14)  |
| O(6)#1-Eu(1)-O(1) | 72.12(12)  | O(6)#1-Eu(1)-N(1) | 74.56(14)  |
| O(5)-Eu(1)-O(13)  | 75.27(13)  | O(1)-Eu(1)-N(1)   | 83.26(13)  |

|                    |            |                   |            |
|--------------------|------------|-------------------|------------|
| O(9)-Eu(1)-O(13)   | 72.29(12)  | O(13)-Eu(1)-N(1)  | 74.73(13)  |
| O(6)#1-Eu(1)-O(13) | 73.35(12)  | O(2)-Eu(1)-N(1)   | 129.72(13) |
| O(1)-Eu(1)-O(13)   | 142.85(13) | N(2)-Eu(1)-N(1)   | 61.80(14)  |
| O(5)-Eu(1)-O(2)    | 73.13(12)  | O(5)-Eu(1)-N(5)   | 77.87(13)  |
| O(9)-Eu(1)-O(2)    | 142.63(14) | O(9)-Eu(1)-N(5)   | 74.85(13)  |
| O(6)#1-Eu(1)-O(2)  | 70.58(14)  | O(6)#1-Eu(1)-N(5) | 141.78(13) |
| O(1)-Eu(1)-O(2)    | 52.27(11)  | O(1)-Eu(1)-N(5)   | 77.48(13)  |
| O(13)-Eu(1)-O(2)   | 125.58(11) | O(13)-Eu(1)-N(5)  | 139.65(12) |
| O(5)-Eu(1)-N(2)    | 135.90(14) | O(2)-Eu(1)-N(5)   | 72.64(13)  |
| O(9)-Eu(1)-N(2)    | 69.32(12)  | N(2)-Eu(1)-N(5)   | 62.69(14)  |
| O(6)#1-Eu(1)-N(2)  | 122.17(13) | N(1)-Eu(1)-N(5)   | 124.46(13) |

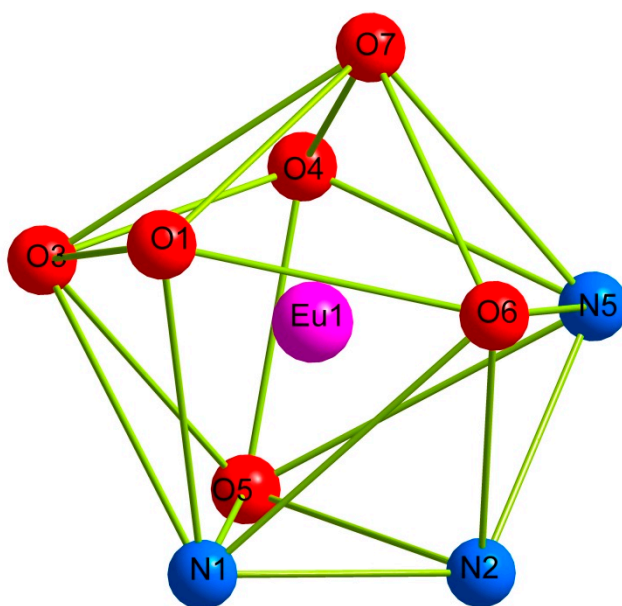

**Figure S2.** Coordination polyhedron of  $\text{Eu}^{3+}$  ions in crystal **2**

**Table S2.** Selected Bond lengths [ $\text{\AA}$ ] and angles [ $^\circ$ ] for crystal **2**

| Bond       |           |            |           |
|------------|-----------|------------|-----------|
| Eu(1)-O(5) | 2.406(9)  | Eu(1)-O(4) | 2.497(9)  |
| Eu(1)-O(1) | 2.420(12) | Eu(1)-N(2) | 2.585(11) |
| Eu(1)-O(6) | 2.435(12) | Eu(1)-N(1) | 2.592(10) |
| Eu(1)-O(7) | 2.437(9)  | Eu(1)-N(5) | 2.628(11) |
| Eu(1)-O(3) | 2.446(14) |            |           |

| Angle           |          |                   |          |
|-----------------|----------|-------------------|----------|
| O(5)-Eu(1)-O(1) | 130.5(4) | O(5)-Eu(1)-N(5)   | 86.6(3)  |
| O(5)-Eu(1)-O(6) | 139.1(4) | O(1)-Eu(1)-N(5)   | 142.6(4) |
| O(1)-Eu(1)-O(6) | 73.8(5)  | O(6)-Eu(1)-N(5)   | 73.8(4)  |
| O(5)-Eu(1)-O(7) | 138.6(3) | O(7)-Eu(1)-N(5)   | 80.2(4)  |
| O(1)-Eu(1)-O(7) | 73.3(4)  | O(3)-Eu(1)-N(5)   | 139.6(4) |
| O(6)-Eu(1)-O(7) | 73.8(4)  | O(4)-Eu(1)-N(5)   | 70.5(3)  |
| O(5)-Eu(1)-O(3) | 73.9(4)  | N(2)-Eu(1)-N(5)   | 62.1(3)  |
| O(1)-Eu(1)-O(3) | 67.9(5)  | N(1)-Eu(1)-N(5)   | 122.8(3) |
| O(6)-Eu(1)-O(3) | 141.5(5) | O(5)-Eu(1)-H(5A)  | 16.6     |
| O(7)-Eu(1)-O(3) | 91.3(4)  | O(1)-Eu(1)-H(5A)  | 113.9    |
| O(5)-Eu(1)-O(4) | 70.1(3)  | O(6)-Eu(1)-H(5A)  | 144.7    |
| O(1)-Eu(1)-O(4) | 120.8(4) | O(7)-Eu(1)-H(5A)  | 141.3    |
| O(6)-Eu(1)-O(4) | 131.3(3) | O(3)-Eu(1)-H(5A)  | 60.7     |
| O(7)-Eu(1)-O(4) | 68.4(4)  | O(4)-Eu(1)-H(5A)  | 76.4     |
| O(3)-Eu(1)-O(4) | 69.6(4)  | N(2)-Eu(1)-H(5A)  | 77.4     |
| O(5)-Eu(1)-N(2) | 68.8(3)  | N(1)-Eu(1)-H(5A)  | 65.5     |
| O(1)-Eu(1)-N(2) | 121.6(4) | N(5)-Eu(1)-H(5A)  | 103.2    |
| O(6)-Eu(1)-N(2) | 70.2(4)  | O(5)-Eu(1)-H(5B)  | 16.6     |
| O(7)-Eu(1)-N(2) | 133.4(4) | O(1)-Eu(1)-H(5B)  | 135.7    |
| O(3)-Eu(1)-N(2) | 135.1(4) | O(6)-Eu(1)-H(5B)  | 122.4    |
| O(4)-Eu(1)-N(2) | 117.5(3) | O(7)-Eu(1)-H(5B)  | 147.5    |
| O(5)-Eu(1)-N(1) | 74.6(3)  | O(3)-Eu(1)-H(5B)  | 89.1     |
| O(1)-Eu(1)-N(1) | 72.7(4)  | O(4)-Eu(1)-H(5B)  | 81.3     |
| O(6)-Eu(1)-N(1) | 86.1(3)  | N(2)-Eu(1)-H(5B)  | 52.2     |
| O(7)-Eu(1)-N(1) | 144.2(3) | N(1)-Eu(1)-H(5B)  | 68.3     |
| O(3)-Eu(1)-N(1) | 86.2(3)  | N(5)-Eu(1)-H(5B)  | 78.5     |
| O(4)-Eu(1)-N(1) | 141.5(3) | H(5A)-Eu(1)-H(5B) | 28.7     |
| N(2)-Eu(1)-N(1) | 60.7(3)  |                   |          |

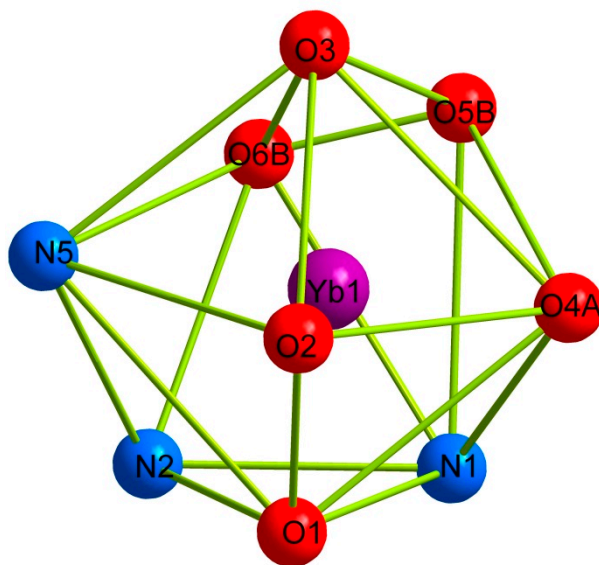

**Figure S3.** Coordination polyhedron of Yb<sup>3+</sup> ions in crystal **3**

**Table S3.** Selected Bond lengths [Å] and angles [°] for crystal **3**

| Bond                |           |                    |           |
|---------------------|-----------|--------------------|-----------|
| Yb(1)-O(4)#1        | 2.172(11) | Yb(1)-O(5)#2       | 2.48(3)   |
| Yb(1)-O(3)          | 2.234(13) | Yb(1)-N(2)         | 2.482(16) |
| Yb(1)-O(6)#2        | 2.326(15) | Yb(1)-N(5)         | 2.498(19) |
| Yb(1)-O(1)          | 2.336(13) | Yb(1)-N(1)         | 2.506(19) |
| Yb(1)-O(2)          | 2.460(13) |                    |           |
| Angle               |           |                    |           |
| O(4)#1-Yb(1)-O(3)   | 90.0(4)   | O(4)#1-Yb(1)-N(1)  | 77.5(5)   |
| O(4)#1-Yb(1)-O(6)#2 | 123.2(6)  | O(3)-Yb(1)-N(1)    | 146.5(5)  |
| O(3)-Yb(1)-O(6)#2   | 80.1(5)   | O(6)#2-Yb(1)-N(1)  | 81.2(6)   |
| O(4)#1-Yb(1)-O(1)   | 85.1(5)   | O(1)-Yb(1)-N(1)    | 79.5(5)   |
| O(3)-Yb(1)-O(1)     | 130.8(5)  | O(2)-Yb(1)-N(1)    | 126.9(5)  |
| O(6)#2-Yb(1)-O(1)   | 140.8(5)  | O(5)#2-Yb(1)-N(1)  | 76.0(9)   |
| O(4)#1-Yb(1)-O(2)   | 76.4(5)   | N(2)-Yb(1)-N(1)    | 63.5(6)   |
| O(3)-Yb(1)-O(2)     | 78.2(5)   | N(5)-Yb(1)-N(1)    | 127.9(6)  |
| O(6)#2-Yb(1)-O(2)   | 150.7(7)  | O(4)#1-Yb(1)-C(19) | 80.6(6)   |
| O(1)-Yb(1)-O(2)     | 53.0(5)   | O(3)-Yb(1)-C(19)   | 104.8(6)  |

|                     |           |                      |           |
|---------------------|-----------|----------------------|-----------|
| O(4)#1-Yb(1)-O(5)#2 | 79.9(7)   | O(6)#2-Yb(1)-C(19)   | 156.0(7)  |
| O(3)-Yb(1)-O(5)#2   | 71.2(9)   | O(1)-Yb(1)-C(19)     | 26.1(6)   |
| O(6)#2-Yb(1)-O(5)#2 | 43.9(8)   | O(2)-Yb(1)-C(19)     | 26.9(6)   |
| O(1)-Yb(1)-O(5)#2   | 153.5(10) | O(5)#2-Yb(1)-C(19)   | 160.1(8)  |
| O(2)-Yb(1)-O(5)#2   | 141.0(8)  | N(2)-Yb(1)-C(19)     | 87.3(6)   |
| O(4)#1-Yb(1)-N(2)   | 134.9(5)  | N(5)-Yb(1)-C(19)     | 76.1(6)   |
| O(3)-Yb(1)-N(2)     | 135.1(5)  | N(1)-Yb(1)-C(19)     | 103.5(6)  |
| O(6)#2-Yb(1)-N(2)   | 73.7(6)   | O(4)#1-Yb(1)-C(26)#2 | 101.8(9)  |
| O(1)-Yb(1)-N(2)     | 67.2(5)   | O(3)-Yb(1)-C(26)#2   | 76.4(10)  |
| O(2)-Yb(1)-N(2)     | 109.2(5)  | O(6)#2-Yb(1)-C(26)#2 | 21.5(9)   |
| O(5)#2-Yb(1)-N(2)   | 109.5(7)  | O(1)-Yb(1)-C(26)#2   | 152.3(10) |
| O(4)#1-Yb(1)-N(5)   | 148.9(5)  | O(2)-Yb(1)-C(26)#2   | 154.6(10) |
| O(3)-Yb(1)-N(5)     | 76.5(5)   | O(5)#2-Yb(1)-C(26)#2 | 22.5(7)   |
| O(6)#2-Yb(1)-N(5)   | 82.4(6)   | N(2)-Yb(1)-C(26)#2   | 90.2(8)   |
| O(1)-Yb(1)-N(5)     | 83.0(5)   | N(5)-Yb(1)-C(26)#2   | 102.0(10) |
| O(2)-Yb(1)-N(5)     | 73.5(5)   | N(1)-Yb(1)-C(26)#2   | 76.0(11)  |
| O(5)#2-Yb(1)-N(5)   | 120.3(8)  | C(19)-Yb(1)-C(26)#2  | 177.4(8)  |
| N(2)-Yb(1)-N(5)     | 64.5(5)   |                      |           |

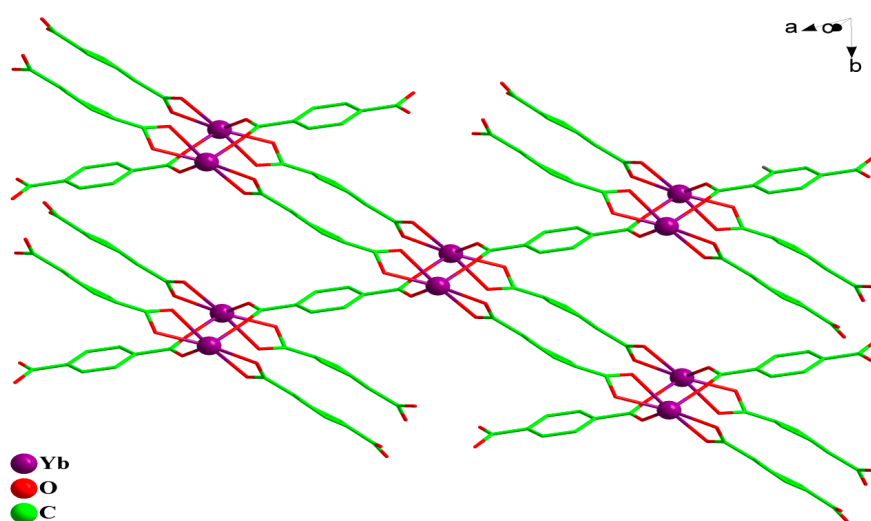

**Figure S4.** The coordination environment of BDC<sup>2-</sup> and Yb<sup>3+</sup> in crystal 3

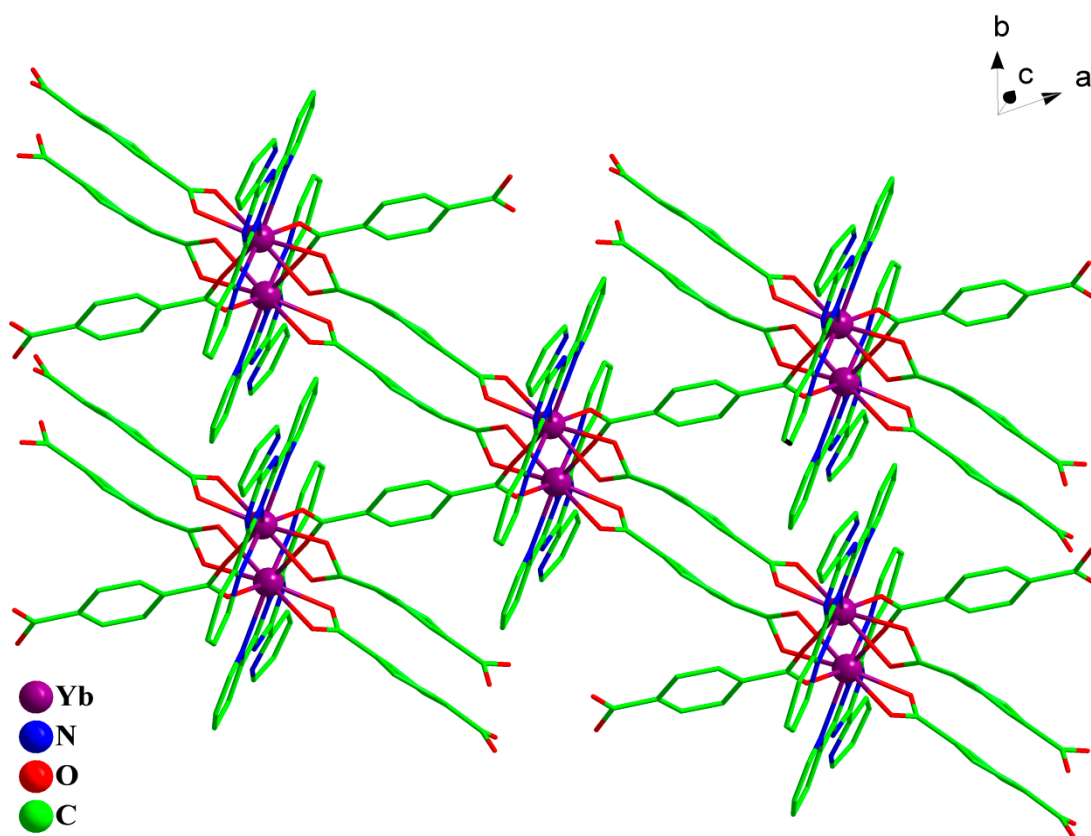

**Figure S5.** The 2D layered structure of crystal 3

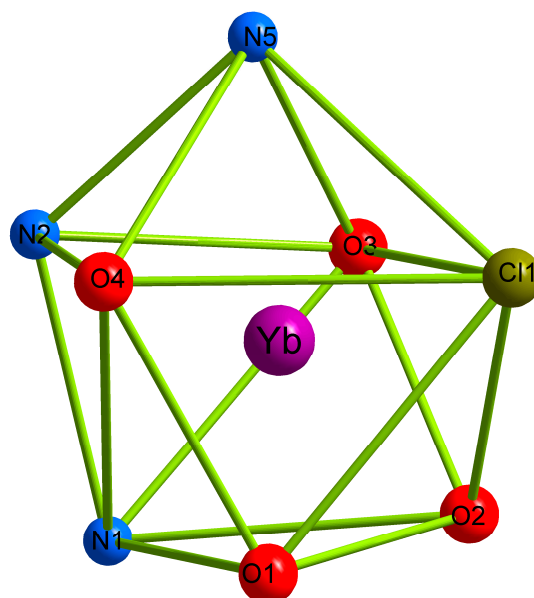

**Figure S6.** Coordination polyhedron of  $\text{Yb}^{3+}$  ions in crystal 4



**Table S4. Selected Bond lengths [Å] and angles [°] for crystal 4**

| Bond            |            |                  |            |
|-----------------|------------|------------------|------------|
| Yb(1)-O(3)      | 2.289(6)   | Yb(1)-N(2)       | 2.457(7)   |
| Yb(1)-O(4)      | 2.325(6)   | Yb(1)-N(1)       | 2.524(7)   |
| Yb(1)-O(2)      | 2.336(6)   | Yb(1)-N(5)       | 2.548(6)   |
| Yb(1)-O(1)      | 2.385(5)   | Yb(1)-Cl(1)      | 2.614(2)   |
| Angle           |            |                  |            |
| O(3)-Yb(1)-O(4) | 141.1(2)   | N(2)-Yb(1)-N(1)  | 64.1(2)    |
| O(3)-Yb(1)-O(2) | 70.7(2)    | O(3)-Yb(1)-N(5)  | 72.6(2)    |
| O(4)-Yb(1)-O(2) | 148.11(19) | O(4)-Yb(1)-N(5)  | 74.0(2)    |
| O(3)-Yb(1)-O(1) | 143.2(2)   | O(2)-Yb(1)-N(5)  | 133.3(2)   |
| O(4)-Yb(1)-O(1) | 73.9(2)    | O(1)-Yb(1)-N(5)  | 143.6(2)   |
| O(2)-Yb(1)-O(1) | 74.7(2)    | N(2)-Yb(1)-N(5)  | 64.8(2)    |
| O(3)-Yb(1)-N(2) | 74.9(2)    | N(1)-Yb(1)-N(5)  | 128.3(2)   |
| O(4)-Yb(1)-N(2) | 73.2(2)    | O(3)-Yb(1)-Cl(1) | 106.80(17) |
| O(2)-Yb(1)-N(2) | 129.0(2)   | O(4)-Yb(1)-Cl(1) | 87.34(15)  |
| O(1)-Yb(1)-N(2) | 120.2(2)   | O(2)-Yb(1)-Cl(1) | 82.17(15)  |
| O(3)-Yb(1)-N(1) | 87.3(2)    | O(1)-Yb(1)-Cl(1) | 80.20(15)  |
| O(4)-Yb(1)-N(1) | 98.2(2)    | N(2)-Yb(1)-Cl(1) | 144.60(15) |
| O(2)-Yb(1)-N(1) | 77.6(2)    | N(1)-Yb(1)-Cl(1) | 149.85(15) |
| O(1)-Yb(1)-N(1) | 73.1(2)    | N(5)-Yb(1)-Cl(1) | 81.75(16)  |

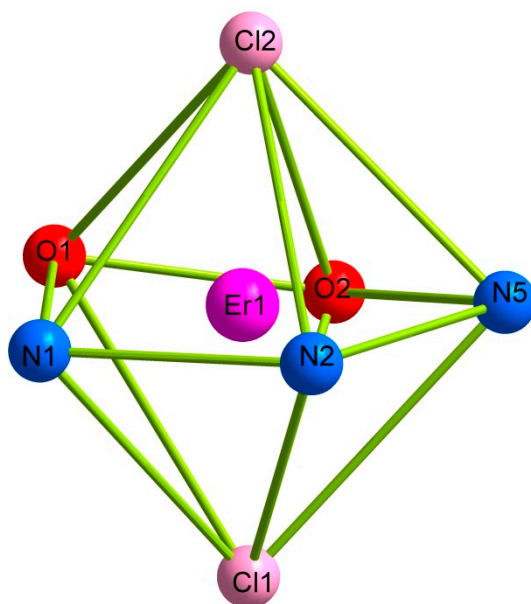

**Figure S7.** Coordination polyhedron of Yb<sup>3+</sup> ions in crystal **5**

**Table S5.** Selected Bond lengths [Å] and angles [°] for crystal **5**

| Bond             |           |                   |            |
|------------------|-----------|-------------------|------------|
| Er(1)-O(2)       | 2.242(7)  | Er(1)-N(5)        | 2.528(7)   |
| Er(1)-O(1)       | 2.280(7)  | Er(1)-Cl(2)       | 2.566(3)   |
| Er(1)-N(2)       | 2.434(8)  | Er(1)-Cl(1)       | 2.577(3)   |
| Er(1)-N(1)       | 2.522(7)  |                   |            |
| Angle            |           |                   |            |
| O(2)-Er(1)-O(1)  | 75.3(2)   | O(1)-Er(1)-Cl(2)  | 88.65(19)  |
| O(2)-Er(1)-N(2)  | 140.5(2)  | N(2)-Er(1)-Cl(2)  | 88.64(19)  |
| O(1)-Er(1)-N(2)  | 143.9(2)  | N(1)-Er(1)-Cl(2)  | 91.9(2)    |
| O(2)-Er(1)-N(1)  | 151.4(2)  | N(5)-Er(1)-Cl(2)  | 85.04(19)  |
| O(1)-Er(1)-N(1)  | 79.0(2)   | O(2)-Er(1)-Cl(1)  | 90.86(19)  |
| N(2)-Er(1)-N(1)  | 65.2(2)   | O(1)-Er(1)-Cl(1)  | 101.55(19) |
| O(2)-Er(1)-N(5)  | 77.9(2)   | N(2)-Er(1)-Cl(1)  | 78.36(19)  |
| O(1)-Er(1)-N(5)  | 150.9(2)  | N(1)-Er(1)-Cl(1)  | 82.3(2)    |
| N(2)-Er(1)-N(5)  | 64.3(2)   | N(5)-Er(1)-Cl(1)  | 89.69(19)  |
| N(1)-Er(1)-N(5)  | 129.5(3)  | Cl(2)-Er(1)-Cl(1) | 166.99(10) |
| O(2)-Er(1)-Cl(2) | 99.62(19) |                   |            |

### 3. Excitation spectra of complexes 1 and 2

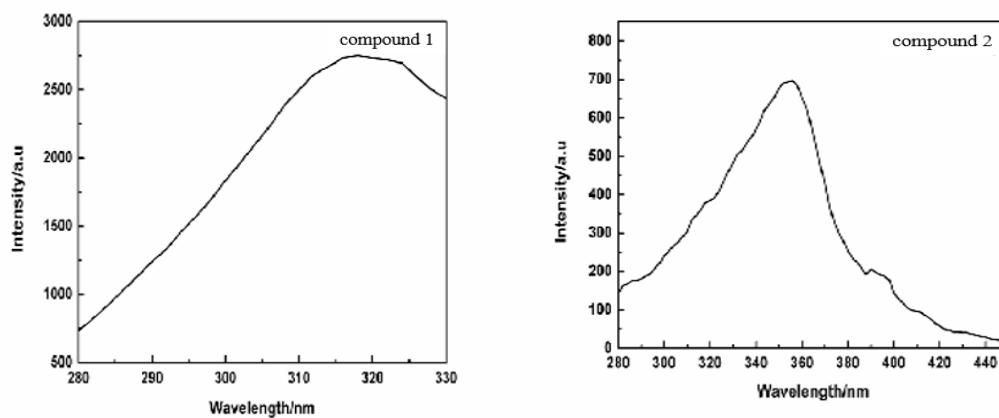

Figure S8. Excitation spectra of complexes 1 and 2

### 4. Fluorescence fit curves of complexes 1 and 2

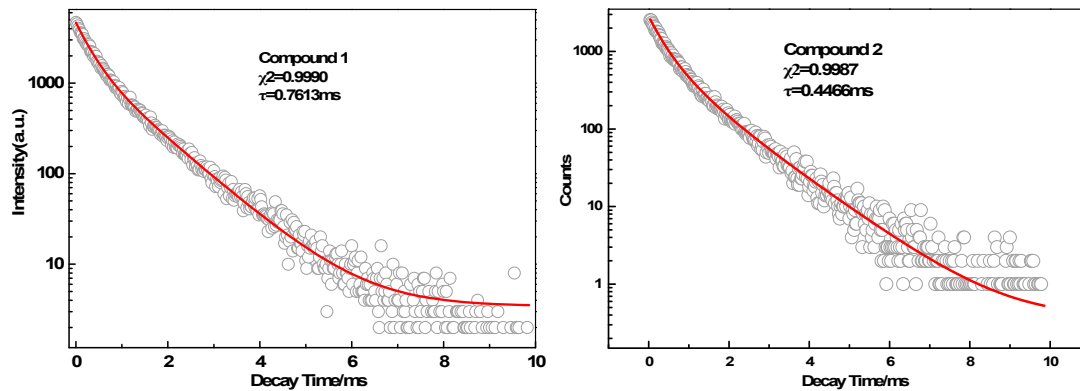

Figure S9. Fluorescence fit curves of complexes 1 and 2
